# Supplementary material for: Parthenocissus quinquefolia from coastal sand dunes are more tolerant than inland populations to salt spray, but neither sand burial nor seedling emergence in sand
Source: Research Square preprint supplement (doi:10.21203/rs.3.rs-8653444/v1), 2026-01-29
Supplement: Supplementary file 1 [file 276888369c2c28c85289a817.docx]

**Supplementary Materials**

**Plant material sampling locations for experiments.**

From July to November 2017, *Parthenocissus quinquefolia* berries were sampled from the field. Experiment codes: 1 (Salt Spray of cuttings), 2 (Salt Spray of seed plants), 3 (Gradual Sand burial), 4 (Sudden Sand Burial), 5 (Seedling Emergence and Seed Mass).

|  | | | | | | |
| --- | --- | --- | --- | --- | --- | --- |
| **Park Sampling Site** | **Provenance** | **Material** | **Latitude** | **Longitude** |  | **Experiment** |
| Assateague State Park, MD (AS) | Dune | seeds | 38.2335 | -75.1390 |  | 2; 3; 4 |
| Assateague State Park, MD (AS) | Dune | seeds | 38.2242 | -75.1430 |  | 5 |
| Assateague State Park, MD (AS) | Dune | seeds | 38.2241 | -75.1427 |  | 5 |
| Assateague State Park, MD (AS) | Dune | seeds | 38.2259 | -75.1420 |  | 2; 3; 4; 5 |
| Assateague State Park, MD (AS) | Dune | cutting | 38.2335 | -75.1390 |  | 1 |
| Assateague State Park, MD (AS) | Dune | cutting | 38.2241 | -75.1428 |  | 1 |
| Barnegat Light, NJ (BL) | Dune | cutting | 39.7550 | -74.1019 |  | 1 |
| Barnegat Light, NJ (BL) | Dune | cutting | 39.7551 | -74.1018 |  | 1 |
| Barnegat Light, NJ (BL) | Dune | seeds | 39.7550 | -74.1018 |  | 2; 3; 5 |
| Barnegat Light, NJ (BL) | Dune | seeds | 39.7622 | -74.1043 |  | 2; 3; 5 |
| Barnegat Light, NJ (BL) | Dune | seeds | 39.7610 | -74.1042 |  | 5 |
| Barnegat Light, NJ (BL) | Dune | seeds | 39.7550 | -74.1018 |  | 4 |
| DE Seashore State Park South Inlet (DI) | Dune | cutting | 38.6048 | -75.0611 |  | 1 |
| DE Seashore State Park South Inlet (DI) | Dune | cutting | 38.6064 | -75.0611 |  | 1 |
| DE Seashore State Park Tower Rd. (DT) | Dune | cutting | 38.6785 | -75.0698 |  | 1 |
| Island Beach State Park, NJ (IB) | Dune | seeds | 39.7964 | -74.0932 |  | 5 |
| Island Beach State Park, NJ (IB) | Dune | seeds | 39.8029 | -74.0923 |  | 3; 5 |
| Island Beach State Park, NJ (IB) | Dune | seeds | 39.8035 | -74.0917 |  | 2 |
| Island Beach State Park, NJ (IB) | Dune | seeds | 39.7966 | -74.0936 |  | 2; 3; 4; 5 |
| Island Beach State Park, NJ (IB) | Dune | seeds | 39.7966 | -74.0933 |  | 5 |
| Island Beach State Park, NJ (IB) | Dune | seeds | 39.7964 | -74.0929 |  | 5 |
| Island Beach State Park, NJ (IB) | Dune | cutting | 39.8029 | -74.0923 |  | 1 |
| Island Beach State Park, NJ (IB) | Dune | cutting | 39.7964 | -74.0929 |  | 1 |
| Island Beach State Park, NJ (IB) | Dune | cutting | 39.8030 | -74.0940 |  | 1 |
| Hutcheson Memorial Forest, NJ (HF) | Inland | cutting | 40.5004 | -74.5636 |  | 1 |
| Hutcheson Memorial Forest, NJ (HF) | Inland | cutting | 40.5006 | -74.5646 |  | 1 |
| Hutcheson Memorial Forest, NJ (HF) | Inland | seeds | 40.5004 | -74.5636 |  | 5 |
| Hutcheson Memorial Forest, NJ (HF) | Inland | seeds | 40.5006 | -74.5646 |  | 2; 5 |
| Manasquan Reservoir, NJ (MR) | Inland | seeds | 40.1779 | -74.2198 |  | 3; 4 |
| Manasquan Reservoir, NJ (MR) | Inland | cutting | 40.1775 | -74.2199 |  | 1 |
| Manasquan Reservoir, NJ (MR) | Inland | cutting | 40.1779 | -74.2198 |  | 1 |
| Perrineville Lake, NJ (PL) | Inland | seeds | 40.2355 | -74.4323 |  | 2; 3; 4; 5 |
| Perrineville Lake, NJ (PL) | Inland | seeds | 40.2347 | -74.4316 |  | 2; 3; 5 |
| Rutgers Gardens, NJ (RG) | Inland | seeds | 40.4730 | -74.4245 |  | 3; 4; 5 |
| Rutgers Gardens, NJ (RG) | Inland | seeds | 40.4788 | -74.4163 |  | 5 |
| Rutgers Gardens, NJ (RG) | Inland | cutting | 40.4731 | -74.4245 |  | 1 |
| Rutgers Gardens, NJ (RG) | Inland | cutting | 40.4788 | -74.4163 |  | 1 |
| Sourland Mountain Preserve, NJ (SM) | Inland | seeds | 40.4970 | -74.7159 |  | 2 |
| Sourland Mountain Preserve, NJ (SM) | Inland | seeds | 40.4727 | -74.6961 |  | 5 |
| Weltz Park, NJ (WP) | Inland | seeds | 40.2669 | -74.0367 |  | 2 |
| Weltz Park, NJ (WP) | Inland | cutting | 40.2680 | -74.0366 |  | 1 |
